# Supplementary material for: Dehydrogenative coupling of silanes with alcohols catalyzed by Cu3(BTC)2
Source: Royal Society of Chemistry journal article supplement (doi:10.1039/c5cc10216b), 2016-01-01
Supplement: c5cc10216b1.pdf [file c5cc10216b1.pdf]

## Supporting Information

### Dehydrogenative coupling of silanes with alcohols catalyzed by $\text{Cu}_3(\text{BTC})_2$

Amarajothi Dhakshinamoorthy,<sup>a,b\*</sup> Patricia Concepcion,<sup>b</sup> Hermenegildo Garcia<sup>b,c\*</sup>

<sup>a</sup>School of Chemistry, Madurai Kamaraj University, Tamil Nadu, India 625 021.

<sup>b</sup>Instituto Universitario de Tecnología Química CSIV-UPV, Universidad Politecnica de Valencia, Av. De los Naranjos s/n, 46022, Valencia, Spain.

<sup>c</sup>Centre of Excellence for Advanced Materials Research, King Abdulaziz University, Jeddah, Saudi Arabia.

## **Experimental procedure**

### **Materials**

$\text{Cu}_3(\text{BTC})_2$  commercially known as Basolite C 300 MOF, dimethylphenylsilane, diphenylsilane, triphenylsilane and phenylsilane used in the present study was purchased from Sigma Aldrich and used as received. Alcohols like 1-butanol, methanol, ethanol and 2-propanol used in the present study were purchased from Sigma Aldrich.

### **Instrumentation**

Powder XRD diffraction patterns were measured in the reflection mode in a Philips X'Pert diffractometer using the  $\text{CuK}\alpha$  radiation ( $\lambda = 1.54178 \text{ \AA}$ ) as the incident beam, PW3050/60 (2 theta) as Goniometer, PW 1774 spinner as sample stage, PW 3011 as detector, incident mask fixed with 10 mm. PW3123/10 for Cu was used as a monochromator. PW3373/00 Cu LFF was used as X-ray tube with power scanning of 45 kV and 40 mA current. The sample powder was loaded into a holder and levelled with a glass slide before mounting it on the sample chamber. The specimens were scanned between  $2^\circ$  and  $70^\circ$  with the scan rate of  $0.02^\circ/\text{s}$ . ESR spectra were recorded by using a Bruker EMX spectrometer, with the typical settings (frequency 9.80 GHz, sweep width 30.6 G, time constant 80 ms, modulation frequency 100 kHz, modulation width 0.2 G, microwave power 200 mW).

### **Reaction procedure**

In a typical reaction, 50 mg of  $\text{Cu}_3(\text{BTC})_2$  was added to 2 mL of 1-butanol containing 1 mmol of dimethylphenylsilane. This reaction mixture was stirred at the required temperature for the required time as indicated in Tables 1 and 2. It was observed that the reaction mixture turns from blue to pale red after 5 min with the evolution of hydrogen gas. The reaction progress was monitored by gas chromatography and after completion of the

reaction, the mixture was washed twice with 1-butanol and filtered. Then, the product is analyzed by gas chromatography for its purity and selectivity. Conversion and selectivity were determined by Agilent gas chromatography using internal standard method.  $^1\text{H-NMR}$  spectra were recorded with 400 MHz using tetramethylsilane as internal standard. The same procedure is followed for the reusability experiments.

### **Experimental procedure for FT-IR studies**

IR studies were performed using a quartz IR cell allowing in situ treatments in controlled atmospheres and temperatures (from 25 °C to 500 °C) and connected to a vacuum system with gas dosing facility. Spectra were recorded with a Bruker 70V FTIR spectrometer using a DTGS detector and acquiring at  $4\text{ cm}^{-1}$  resolution. For IR studies the samples were pressed into self-supported wafers and treated at 150 °C in vacuum ( $10^{-5}\text{mbar}$ ) for 1h. For the reduced sample, activation in  $\text{H}_2$  flow at 150°C 1h followed by vacuum treatment at the same temperature for 1h was performed. In the n-butanol adsorption experiments, 0.5mbar n-butanol has been adsorbed on both activated and reduced samples. In the in situ reaction studies dimethylphenylsilane has been first adsorbed at 25°C on  $\text{Cu}_3(\text{BTC})_2$  catalyst surface, removing the non interacting species and followed by n-butanol co-adsorption at 0.5mbar. Reaction temperature has been increased to 70°C. After the in situ IR studies the gas phase has been evacuated and CO has been adsorbed (35mbar) at 25°C in order to titrate surface active sites present under reaction conditions.
